# Supplementary material for: Gridded Flood Depth Estimates from Satellite Derived Inundations
Source: Copernicus journal article supplement (doi:10.5194/nhess-2021-275), 2021-10-14
Supplement: Supplementary file 1 [file Fig. S1 (2021 10 13).pdf › Fig. S1 (2021 10 13).pdf]

Figure S1  
Rivière des Prairies at Montreal, Quebec — May 2017 Flood  
Tool Data Inputs

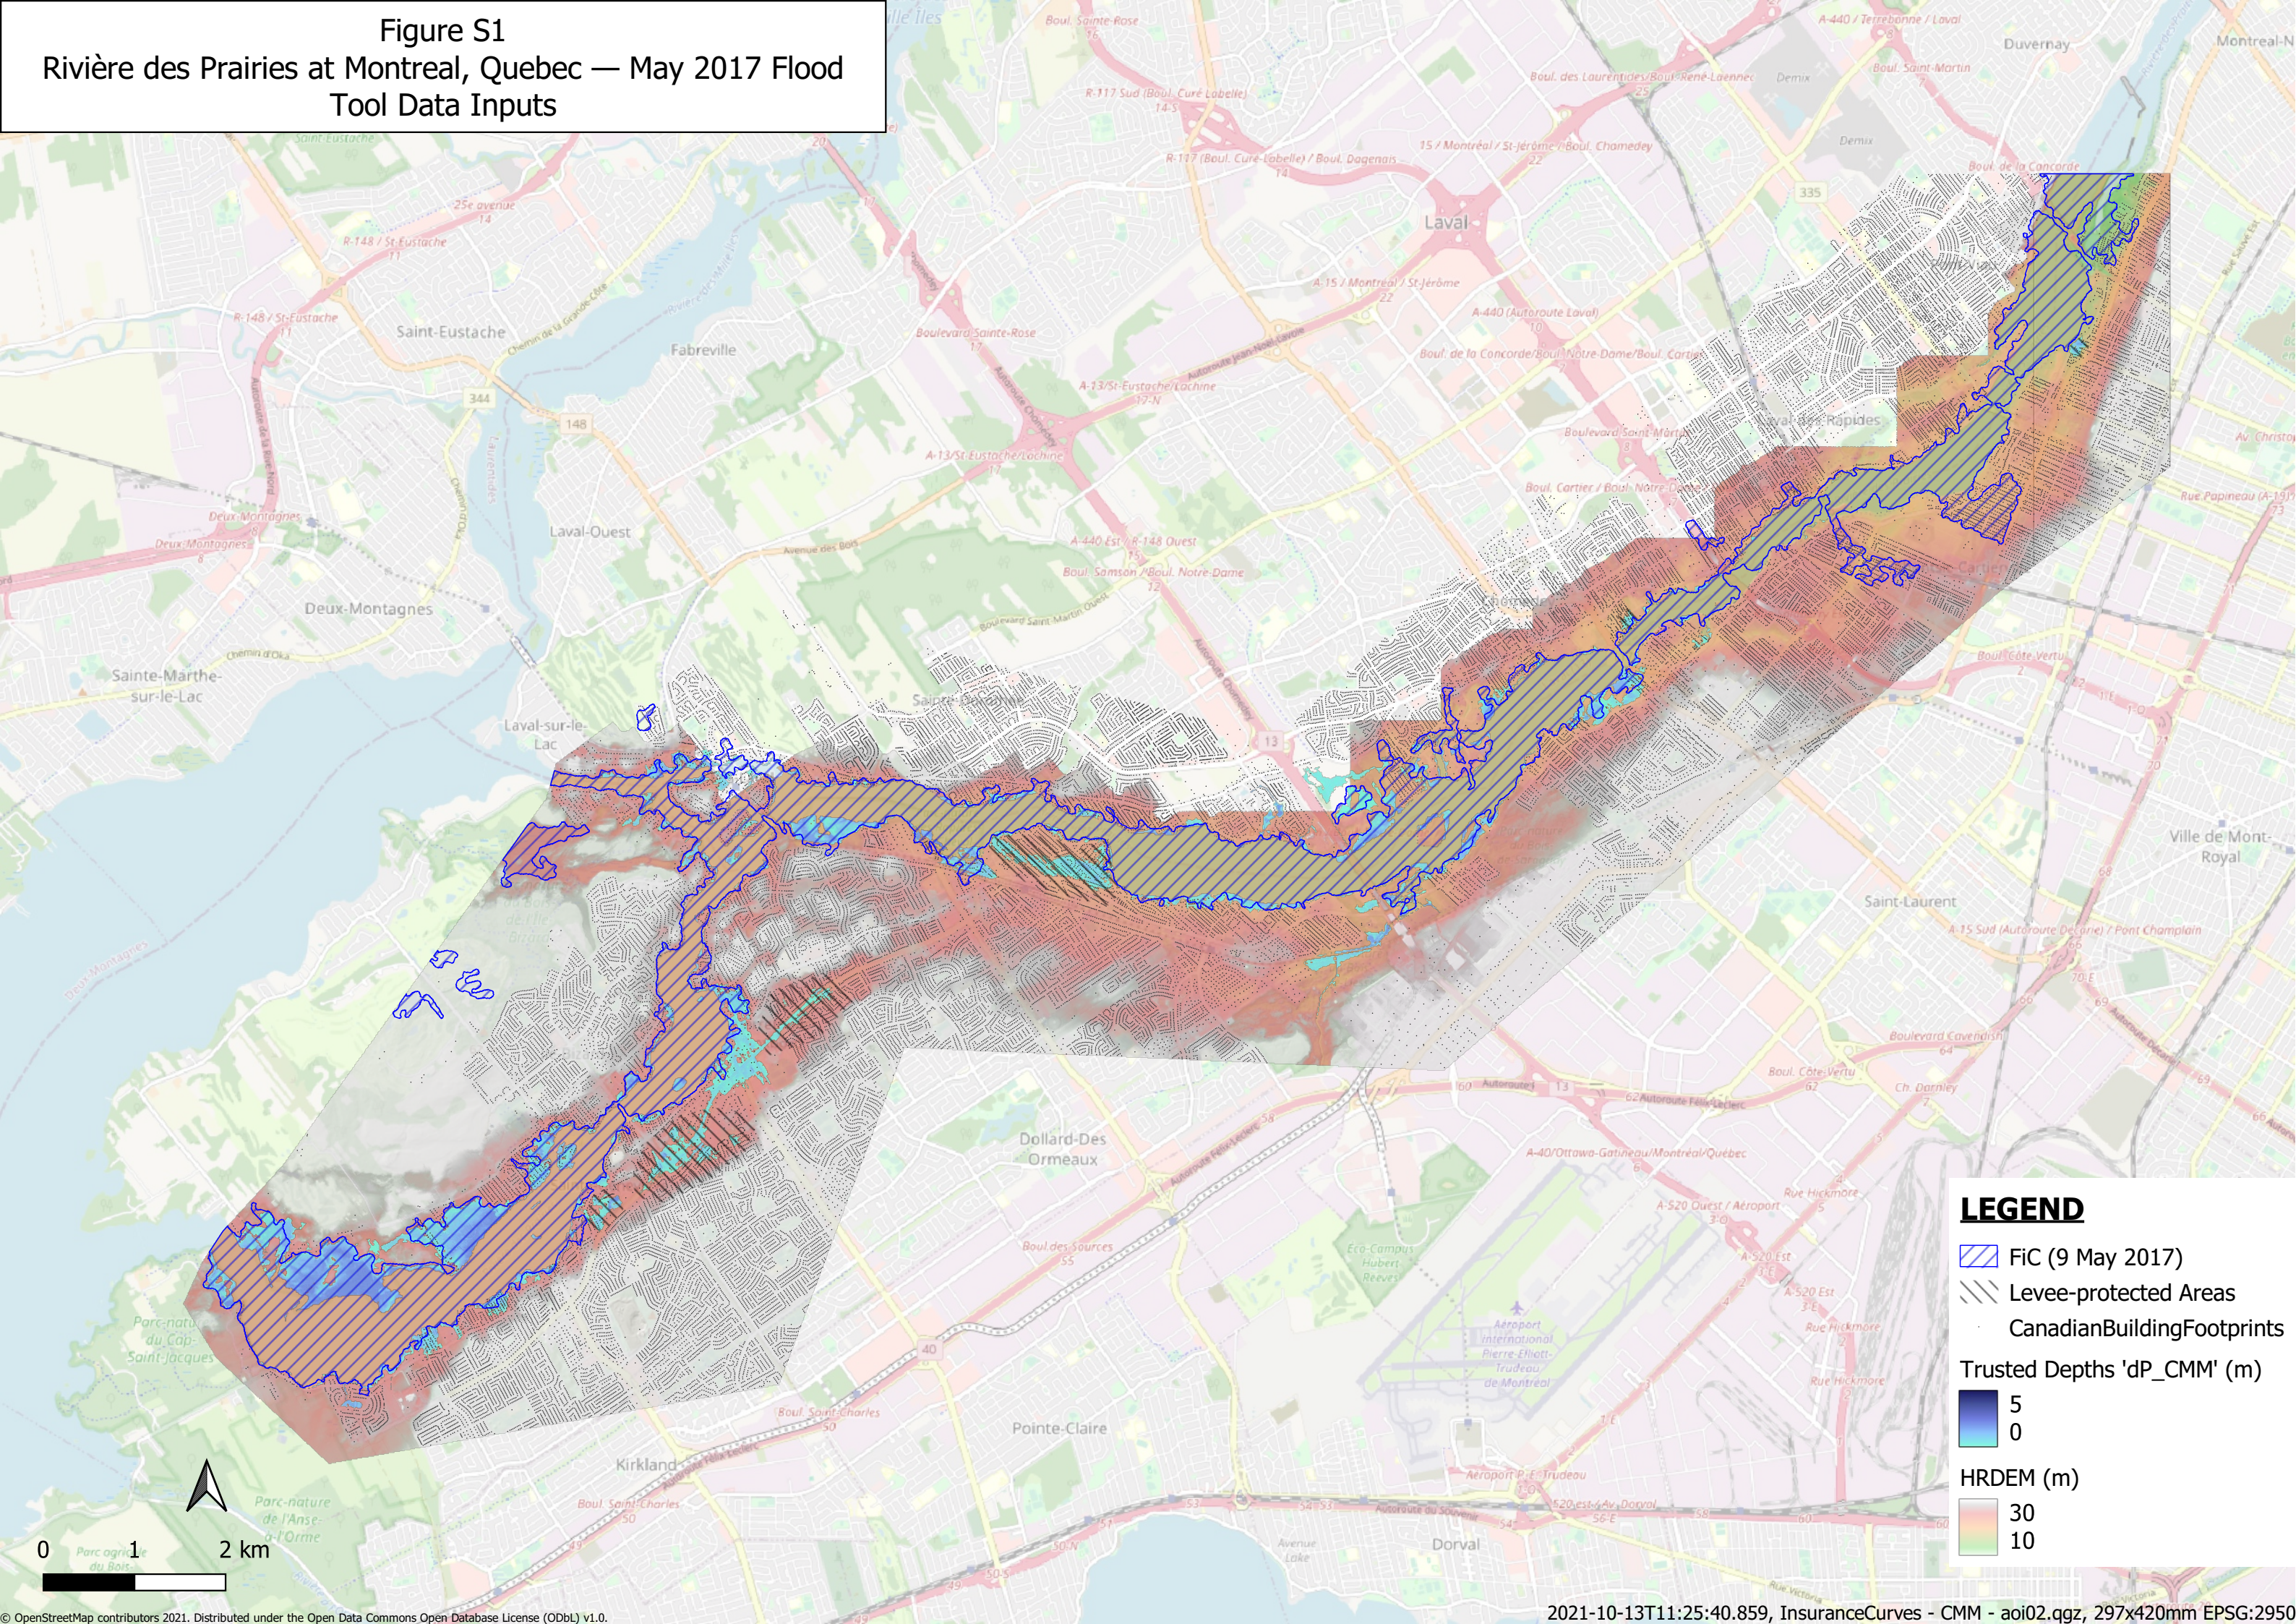

## LEGEND

FiC (9 May 2017)

Levee-protected Areas

CanadianBuildingFootprints

Trusted Depths 'dP\_CMM' (m)

5  
 0

HRDEM (m)

30  
 10
