# Supplementary material for: Gridded Flood Depth Estimates from Satellite Derived Inundations
Source: Copernicus journal article supplement (doi:10.5194/nhess-2021-275), 2021-10-14
Supplement: Supplementary file 2 [file Fig. S2 (2021 10 13).pdf › Fig. S2 (2021 10 13).pdf]

Figure S2  
Saint John River at Fredericton, New Brunswick — May 2018 Flood  
Data Inputs

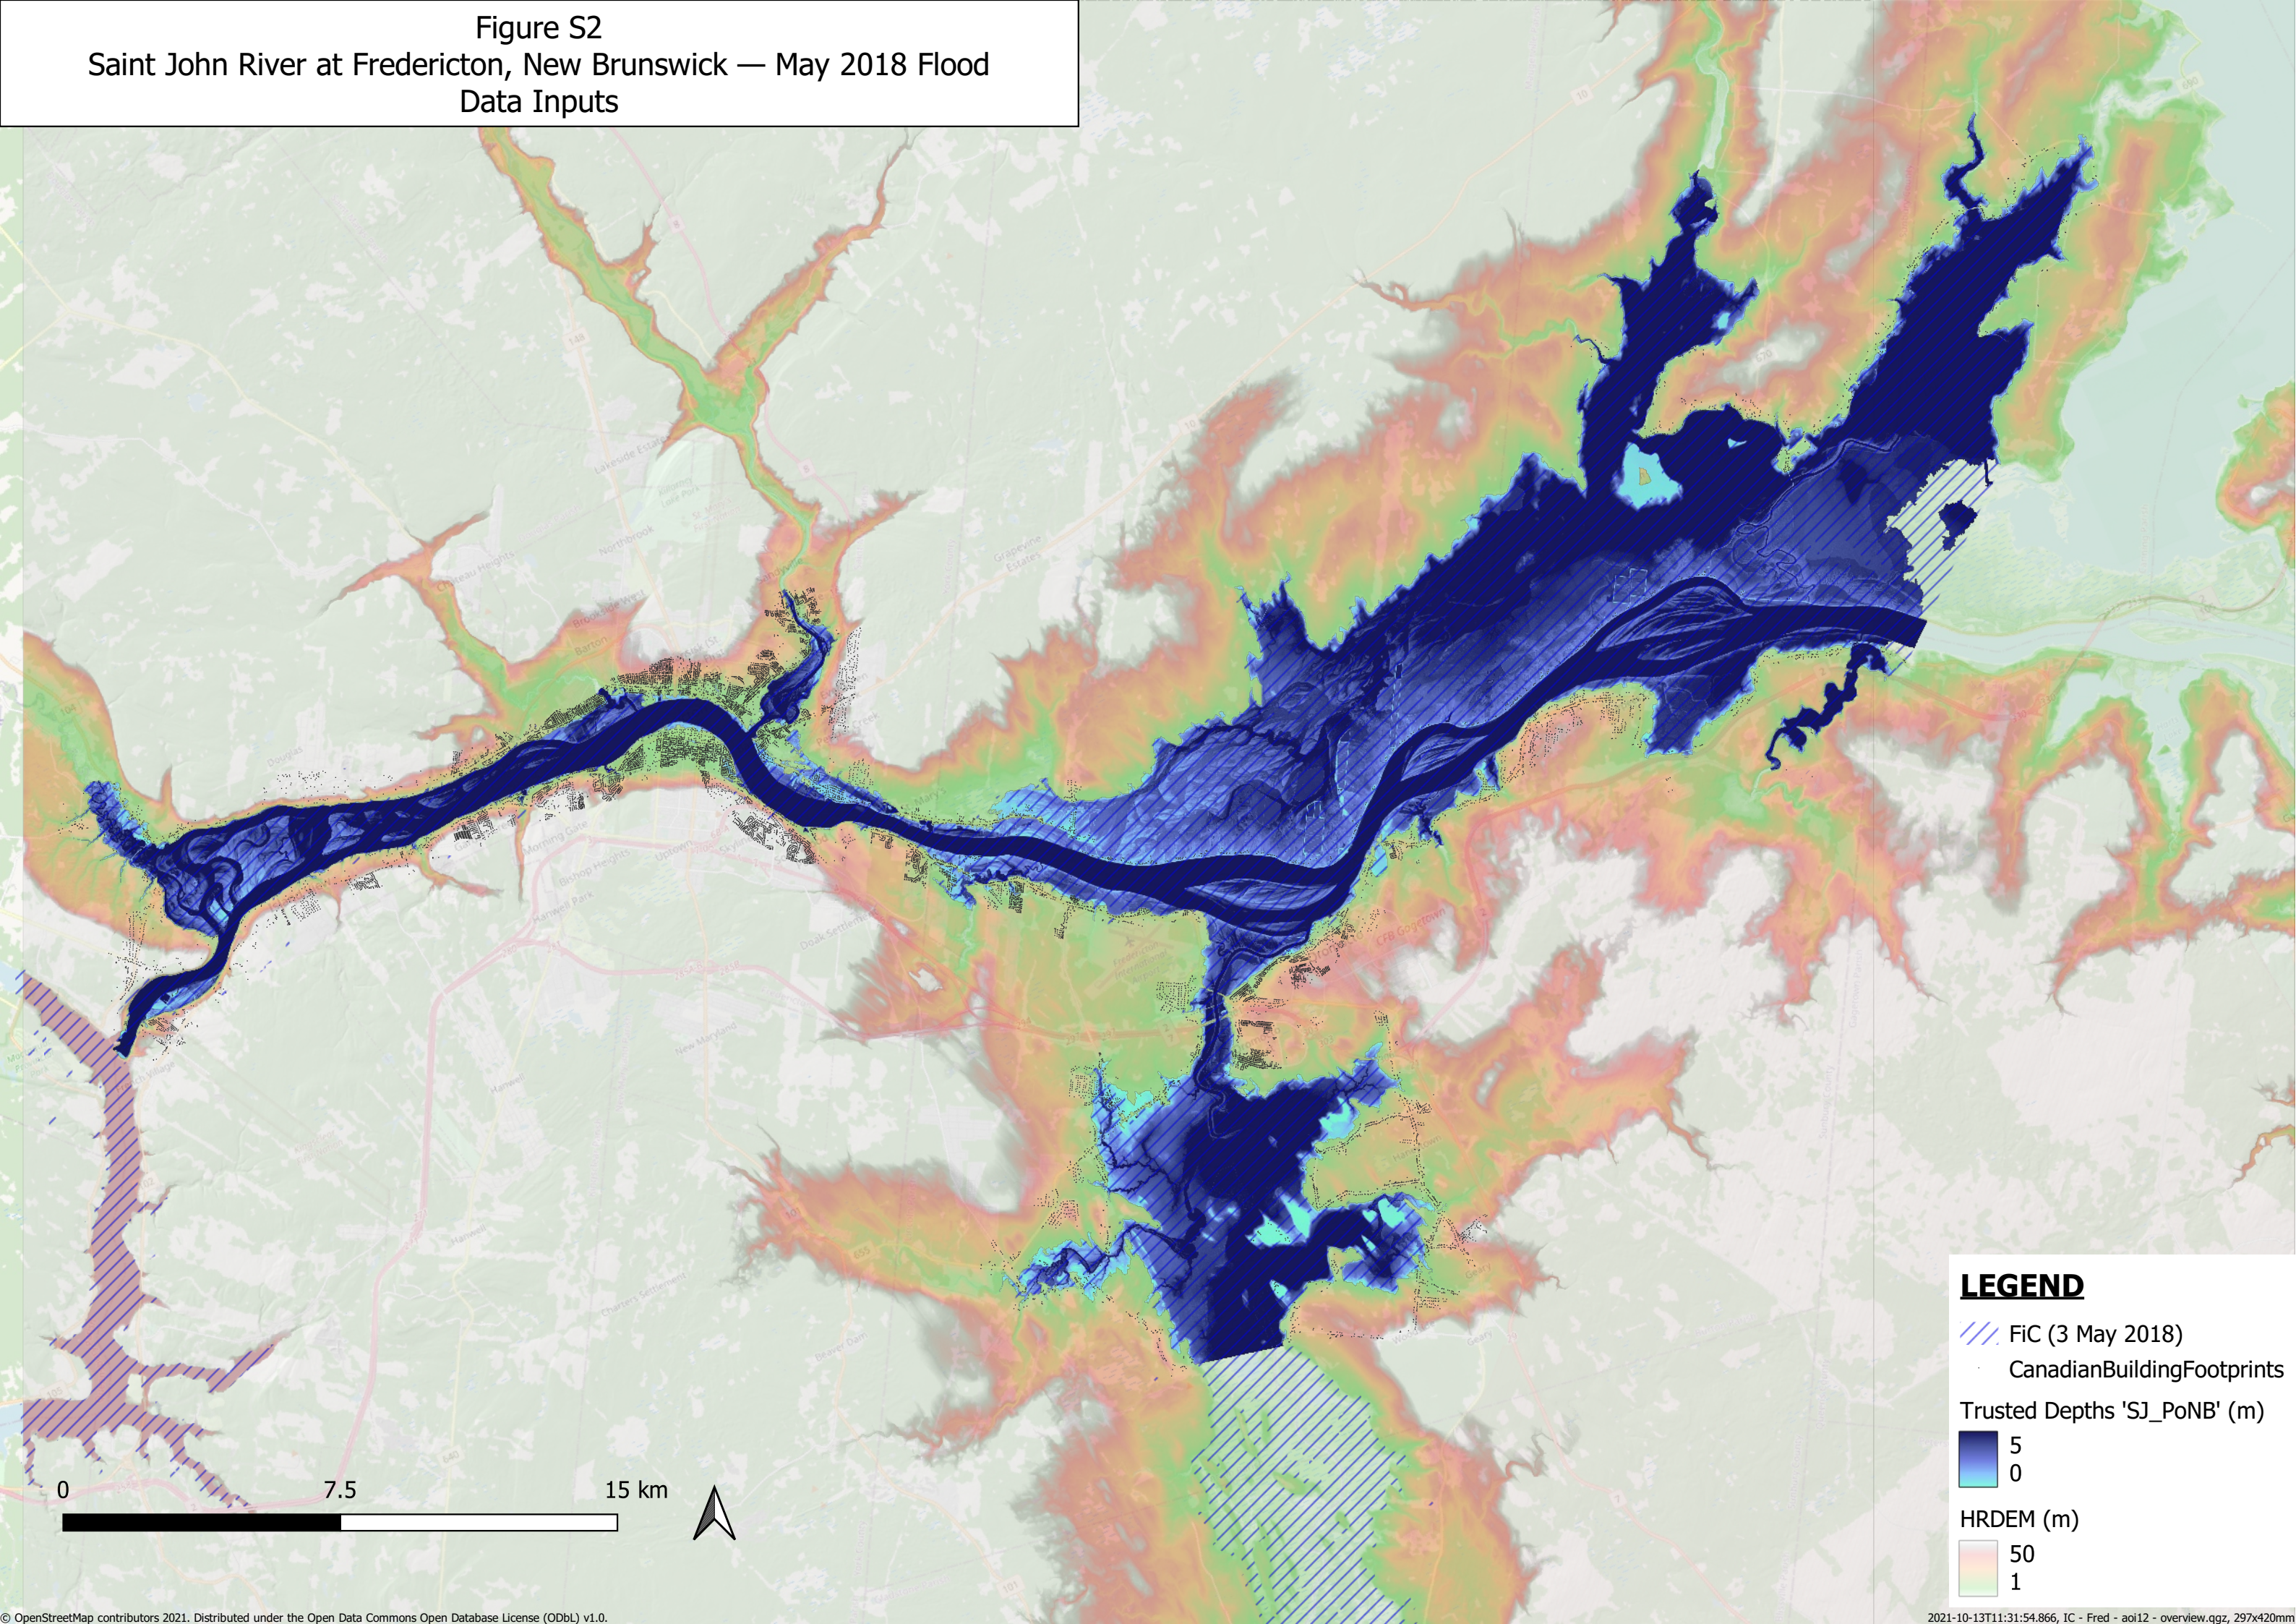

**LEGEND**

-  FIC (3 May 2018)
-  CanadianBuildingFootprints
- Trusted Depths 'SJ\_PoNB' (m)
  -  5
  -  0
- HRDEM (m)
  -  50
  -  1
